# Supplementary material for: Racial-Ethnic Disparities in Outpatient Mental Health Visits to U.S. Physicians, 1993–2008
Source: Atypon-hosted journal article supplement (doi:10.1176/appi.ps.201200528), 2013-10-15
Supplement: 59_ds001.pdf [file 59_ds001.pdf]

**Supplemental Table 1 (S1).** Racial/ethnic population-based rates of outpatient mental health visits, by mental disorder

| Disorder                                 | Visit rate per 1,000 (VR) |        |       |                    |        |       |          |        |       |       |        |       |
|------------------------------------------|---------------------------|--------|-------|--------------------|--------|-------|----------|--------|-------|-------|--------|-------|
|                                          | White non-Hispanic        |        |       | Black non-Hispanic |        |       | Hispanic |        |       | Other |        |       |
|                                          | VR                        | 95% CI |       | VR                 | 95% CI |       | VR       | 95% CI |       | VR    | 95% CI |       |
| Any Disorder                             | 197                       | 188    | - 206 | 118                | 104    | - 131 | 114      | 99     | - 130 | 90    | 78     | - 103 |
| Depressive Disorder                      | 88                        | 83     | - 93  | 39                 | 33     | - 45  | 48       | 40     | - 55  | 33    | 26     | - 40  |
| Major Depression                         | 35                        | 32     | - 38  | 19                 | 14     | - 23  | 22       | 17     | - 26  | 14    | 11     | - 18  |
| Dysthymia                                | 18                        | 17     | - 19  | 5                  | 4      | - 7   | 8        | 4      | - 12  | 5     | 3      | - 7   |
| Psychotic Disorder                       | 17                        | 16     | - 19  | 25                 | 20     | - 31  | 15       | 11     | - 19  | 13    | 9      | - 16  |
| Schizophrenia                            | 9                         | 8      | - 10  | 19                 | 14     | - 24  | 9        | 6      | - 13  | 7     | 5      | - 10  |
| Bipolar Disorder                         | 17                        | 16     | - 19  | 9                  | 7      | - 11  | 7        | 5      | - 8   | 7     | 5      | - 9   |
| Bipolar I Disorder                       | 11                        | 10     | - 12  | 6                  | 5      | - 8   | 4        | 3      | - 5   | 5     | 4      | - 7   |
| Bipolar II Disorder                      | 6                         | 5      | - 7   | 2                  | 2      | - 3   | 3        | 2      | - 4   | 1     | 1      | - 2   |
| Anxiety Disorder                         | 37                        | 35     | - 40  | 15                 | 12     | - 18  | 20       | 17     | - 24  | 17    | 12     | - 21  |
| Agoraphobia                              | 1                         | .9     | - 1   | .4                 | .2     | - .6  | .9       | .5     | - 1   | .3    | 0      | - .8  |
| Generalized Anxiety Disorder             | 5                         | 4      | - 6   | 1                  | .4     | - 2   | 2        | 1      | - 4   | 1     | .3     | - 2   |
| Obsessive Compulsive Disorder            | 3                         | 2      | - 3   | .3                 | .1     | - .5  | .7       | .2     | - 1   | 1     | .5     | - 2   |
| Panic Disorder                           | 6                         | 5      | - 6   | 2                  | 1      | - 3   | 2        | 1      | - 3   | 2     | .1     | - 3   |
| Post-Traumatic Stress Disorder           | 3                         | 2      | - 4   | 2                  | 1      | - 3   | 2        | 1      | - 2   | 2     | .4     | - 4   |
| Social Phobia                            | .3                        | .2     | - .4  | .3                 | 0      | - .6  | .2       | 0      | - .4  | .2    | 0      | - .4  |
| Adjustment Disorder                      | 7                         | 6      | - 8   | 3                  | 2      | - 4   | 3        | 2      | - 4   | 5     | 1      | - 8   |
| Attention Deficit/Hyperactivity Disorder | 6                         | 5      | - 7   | 1                  | .6     | - 2   | 3        | 1      | - 4   | 1     | .5     | - 2   |
| Impulse Control Disorder                 | .6                        | .3     | - .8  | .4                 | .04    | - .7  | .04      | 0      | - .1  | .2    | 0      | - .5  |
| Substance Use Disorder                   | 11                        | 9      | - 14  | 17                 | 10     | - 24  | 9        | 4      | - 15  | 5     | 2      | - 7   |
| Alcohol Use Disorder                     | 4                         | 3      | - 4   | 6                  | 4      | - 8   | 2        | 1      | - 3   | 1     | .2     | - 1   |
| Drug Use Disorder                        | 5                         | 3      | - 7   | 11                 | 5      | - 17  | 7        | 2      | - 11  | 2     | 1      | - 4   |
| Nicotine Use Disorder                    | 2                         | 2      | - 3   | 1                  | .3     | - 1   | 1        | .1     | - 1   | 2     | 0      | - 4   |
| Personality Disorder                     | 3                         | 2      | - 4   | 1                  | .3     | - 1   | 1        | 0      | - 1   | 1     | .2     | - 2   |
| Somatiform Disorder                      | 1                         | .6     | - 1   | .3                 | .01    | - .5  | 1        | 0      | - 1   | 1     | 0      | - 94  |
| Autistic Spectrum Disorder               | .5                        | .2     | - .7  | .3                 | 0      | - .6  | .1       | 0      | - .1  | .2    | 0      | - .4  |
| Other Disorder                           | 15                        | 14     | - 16  | 9                  | 7      | - 11  | 11       | 8      | - 13  | 12    | 8      | - 17  |

**Supplemental Table 2 (S2).** Racial/ethnic population-based rates of outpatient mental health visits, by patient socio-demographic characteristics

| Provider Type<br>Visit Characteristic | Visit rate per 1,000 (VR) |        |       |                    |        |       |          |        |       |       |        |       |
|---------------------------------------|---------------------------|--------|-------|--------------------|--------|-------|----------|--------|-------|-------|--------|-------|
|                                       | White non-Hispanic        |        |       | Black non-Hispanic |        |       | Hispanic |        |       | Other |        |       |
|                                       | VR                        | 95% CI |       | VR                 | 95% CI |       | VR       | 95% CI |       | VR    | 95% CI |       |
| <i>Any Mental Health Visit</i>        | 197                       | 188    | - 206 | 118                | 104    | - 131 | 114      | 99     | - 130 | 90    | 78     | - 103 |
| Male                                  | 248                       | 237    | - 260 | 159                | 139    | - 179 | 132      | 112    | - 151 | 118   | 99     | - 137 |
| Female                                | 149                       | 141    | - 157 | 82                 | 71     | - 94  | 96       | 81     | - 111 | 65    | 52     | - 79  |
| 18-24 years old                       | 144                       | 132    | - 155 | 46                 | 36     | - 55  | 53       | 41     | - 65  | 59    | 41     | - 77  |
| 25-44 years old                       | 215                       | 204    | - 226 | 119                | 101    | - 136 | 95       | 81     | - 109 | 85    | 71     | - 100 |
| 45-64 years old                       | 236                       | 224    | - 249 | 162                | 138    | - 186 | 191      | 158    | - 223 | 103   | 81     | - 125 |
| >64 years old                         | 139                       | 130    | - 149 | 110                | 88     | - 131 | 171      | 131    | - 211 | 122   | 80     | - 164 |
| Northeast                             | 280                       | 256    | - 305 | 168                | 139    | - 197 | 224      | 167    | - 282 | 92    | 70     | - 115 |
| Midwest                               | 160                       | 147    | - 173 | 140                | 101    | - 180 | 119      | 80     | - 159 | 83    | 43     | - 124 |
| South                                 | 169                       | 153    | - 185 | 91                 | 73     | - 109 | 114      | 83     | - 144 | 78    | 56     | - 100 |
| West                                  | 207                       | 190    | - 225 | 137                | 109    | - 164 | 74       | 58     | - 89  | 96    | 76     | - 117 |
| <i>Psychiatrist Visit</i>             | 121                       | 114    | - 129 | 57                 | 47     | - 68  | 56       | 44     | - 68  | 51    | 42     | - 61  |
| Male                                  | 152                       | 142    | - 162 | 80                 | 63     | - 96  | 62       | 48     | - 76  | 60    | 49     | - 70  |
| Female                                | 93                        | 86     | - 100 | 39                 | 30     | - 47  | 49       | 38     | - 61  | 44    | 33     | - 55  |
| 18-24 years old                       | 82                        | 73     | - 91  | 18                 | 12     | - 24  | 28       | 20     | - 36  | 41    | 28     | - 54  |
| 25-44 years old                       | 132                       | 122    | - 141 | 59                 | 47     | - 71  | 47       | 36     | - 58  | 60    | 49     | - 71  |
| 45-64 years old                       | 161                       | 150    | - 172 | 88                 | 68     | - 108 | 94       | 69     | - 119 | 51    | 37     | - 65  |
| >64 years old                         | 68                        | 61     | - 75  | 35                 | 24     | - 46  | 68       | 44     | - 93  | 31    | 15     | - 46  |
| Northeast                             | 181                       | 161    | - 202 | 65                 | 41     | - 88  | 103      | 49     | - 157 | 52    | 36     | - 67  |
| Midwest                               | 78                        | 68     | - 89  | 50                 | 38     | - 63  | 59       | 24     | - 95  | 59    | 20     | - 97  |
| South                                 | 112                       | 96     | - 127 | 53                 | 36     | - 71  | 57       | 36     | - 78  | 54    | 36     | - 71  |
| West                                  | 135                       | 119    | - 151 | 83                 | 63     | - 103 | 36       | 28     | - 45  | 49    | 36     | - 62  |
| <i>Non-psychiatrist Visit</i>         | 90                        | 85     | - 95  | 68                 | 59     | - 78  | 67       | 57     | - 76  | 45    | 36     | - 54  |
| Male                                  | 115                       | 109    | - 121 | 90                 | 77     | - 103 | 78       | 66     | - 91  | 67    | 51     | - 83  |
| Female                                | 67                        | 62     | - 71  | 50                 | 41     | - 58  | 54       | 44     | - 63  | 25    | 18     | - 32  |
| 18-24 years old                       | 70                        | 62     | - 77  | 29                 | 21     | - 36  | 27       | 18     | - 35  | 21    | 8      | - 34  |
| 25-44 years old                       | 99                        | 92     | - 105 | 69                 | 55     | - 82  | 55       | 46     | - 64  | 34    | 24     | - 44  |
| 45-64 years old                       | 94                        | 88     | - 101 | 87                 | 73     | - 101 | 109      | 86     | - 131 | 55    | 38     | - 73  |
| >64 years old                         | 82                        | 75     | - 89  | 79                 | 60     | - 97  | 118      | 84     | - 152 | 100   | 60     | - 140 |
| Northeast                             | 122                       | 109    | - 136 | 114                | 92     | - 137 | 134      | 105    | - 163 | 47    | 29     | - 65  |

|         |    |    |   |     |     |    |   |     |    |    |   |    |    |    |   |    |
|---------|----|----|---|-----|-----|----|---|-----|----|----|---|----|----|----|---|----|
| Midwest | 93 | 84 | - | 102 | 101 | 63 | - | 138 | 71 | 49 | - | 93 | 29 | 15 | - | 43 |
| South   | 69 | 63 | - | 75  | 44  | 36 | - | 52  | 62 | 45 | - | 80 | 32 | 18 | - | 46 |
| West    | 89 | 80 | - | 98  | 64  | 44 | - | 83  | 45 | 31 | - | 59 | 53 | 38 | - | 69 |

---

**Supplement Table 3 (S3).** Racial/ethnic population-based rates of outpatient mental health visits, by time period

| Provider Type<br>Race/ethnicity | Visit rate per 1,000 (VR), by Time Period |           |             |           |             |           |             |           |
|---------------------------------|-------------------------------------------|-----------|-------------|-----------|-------------|-----------|-------------|-----------|
|                                 | 1993 - 1996                               |           | 1997 - 2000 |           | 2001 - 2004 |           | 2005 - 2008 |           |
|                                 | VR                                        | 95% CI    | VR          | 95% CI    | VR          | 95% CI    | VR          | 95% CI    |
| <i>Any Mental Health Visit</i>  |                                           |           |             |           |             |           |             |           |
| White non-Hispanic              | 184                                       | 167 - 201 | 156         | 141 - 171 | 222         | 203 - 241 | 223         | 204 - 242 |
| Black non-Hispanic              | 121                                       | 100 - 142 | 109         | 76 - 142  | 125         | 96 - 155  | 115         | 92 - 139  |
| Hispanic                        | 163                                       | 107 - 220 | 95          | 60 - 130  | 96          | 76 - 115  | 115         | 96 - 134  |
| Other                           | 84                                        | 59 - 109  | 86          | 53 - 120  | 89          | 66 - 111  | 99          | 77 - 121  |
| <i>Psychiatrist Visit</i>       |                                           |           |             |           |             |           |             |           |
| White non-Hispanic              | 114                                       | 99 - 130  | 120         | 105 - 134 | 125         | 109 - 141 | 127         | 110 - 143 |
| Black non-Hispanic              | 57                                        | 38 - 75   | 54          | 36 - 73   | 61          | 34 - 87   | 58          | 37 - 79   |
| Hispanic                        | 77                                        | 37 - 116  | 62          | 30 - 95   | 36          | 26 - 46   | 55          | 39 - 71   |
| Other                           | 47                                        | 31 - 63   | 57          | 30 - 83   | 45          | 32 - 59   | 55          | 40 - 71   |
| <i>Non-psychiatrist Visit</i>   |                                           |           |             |           |             |           |             |           |
| White non-Hispanic              | 70                                        | 63 - 77   | 75          | 66 - 83   | 104         | 94 - 113  | 106         | 95 - 116  |
| Black non-Hispanic              | 63                                        | 49 - 77   | 71          | 42 - 99   | 67          | 54 - 81   | 65          | 51 - 79   |
| Hispanic                        | 85                                        | 52 - 118  | 52          | 33 - 70   | 60          | 45 - 76   | 72          | 57 - 86   |
| Other                           | 40                                        | 22 - 58   | 39          | 18 - 61   | 47          | 31 - 63   | 42          | 26 - 58   |
